# Supplementary material
Source: Springer Nature journal article supplement (https://www.springermedizin.de/resource/supplementary/12889_2014_6919_MOESM1_ESM.pdf/9499272)
Supplement: MOESM1 [file 9499272]

### **Prior to relationship\***

#### **History of abuse**

History of mother beaten by partner (Neither/his only/hers only/both)

Abused in childhood\*\* (neither/him only/her only/both)

#### **Education**

Completed secondary education (neither/him only/her only/ both)

### **Relationship situation\***

#### **Relative status**

Household SES (low/medium/high)

#### **Attitudes**

Reasons for a man to hit partner (none/any)

#### **Alcohol**

Heavy drinking (neither/him only/her only/both)

#### **Other relations**

Woman has children from more than one relationship (No/Yes)

Partner has concurrent relationships (No/Yes)

#### **Non partner violence**

Partner violent with others in past 12 months (No/Yes)

**First sex being forced** (No/ Yes)

### **Relationship quality\***

#### **Quarrel**

(Rarely/sometimes/frequent)

#### **Controlling behavior**

(None/Any)

\* adjusted for women's age (continuous)
